# Supplementary material
Source: publisher site journal article supplement (https://www.dovepress.com/article/406359)
Supplement: Supplementary file 1 [file get_supplementary_file.php]

**Table S****1** The SpO2 results of OSA severity groups.

| **Variables** | **SensEcho** | **PSG** |  | **t** | ***P*** |
| --- | --- | --- | --- | --- | --- |
| **5 ≤ AHI ≤ 15 (events/h)** |  |  |  |  |  |
| Mean SpO2 (%) | 95.86 ± 1.28 | 95.90 ± 1.18 | –0.05 ± 0.23 | –0.204 | 0.841 |
| Minimum SpO2 (%) | 87.43 ± 2.89 | 87.48 ± 5.95 | –0.05 ± 1.18 | –0.040 | 0.968 |
| SpO2 < 90% (min) | 2.62 ± 4.78 | 5.50 ± 16.74 | –2.88 ± 3.76 | –0.766 | 0.452 |
| **15 < AHI ≤ 30 (events/h)** |  |  |  |  |  |
| Mean SpO2 (%) | 94.53 ± 1.51 | 94.80 ± 1.37 | –0.27 ± 0.36 | –0.745 | 0.469 |
| Minimum SpO2 (%) | 80.53 ± 6.33 | 81.07 ± 6.81 | –0.53 ± 0.76 | –0.706 | 0.492 |
| SpO2 < 90% (min) | 31.33 ± 45.82 | 20.42 ± 28.67 | 10.91 ± 6.77 | 1.613 | 0.129 |
| **AHI > 30 (events/h)** |  |  |  |  |  |
| Mean SpO2 (%) | 94.31 ± 1.62 | 94.69 ± 1.35 | –0.38 ± 0.35 | –1.065 | 0.304 |
| Minimum SpO2 (%) | 77.81 ± 6.30 | 79.00 ± 7.04 | –1.19 ± 0.70 | –1.690 | 0.112 |
| SpO2 < 90% (min) | 21.31 ± 26.64 | 20.89 ± 29.75 | 0.42 ± 2.69 | 0.158 | 0.877 |

**Abbreviations:** SpO2, percutaneous oxygen saturation; OSA, obstructive sleep apnea; AHI, apnea-hypopnea index; h, hour; min, minute; %, percentage.
